# Supplementary material
Source: PubMed Central journal article supplement (PMC2756323)
Supplement: NIHMS115652-supplement-1.pdf [file NIHMS115652-supplement-1.pdf]

**Table S1: Additional notes about rhesus macaque TRBV genes**

| Rhesus macaque gene | Human gene homologue | Additional notes                                                                                                                                                                                   |
|---------------------|----------------------|----------------------------------------------------------------------------------------------------------------------------------------------------------------------------------------------------|
| TRBV5-1             | TRBV5-1              | <b>Ambiguity in the identification of the 5' end of the exon.</b> The 5' end of the exon, as determined by comparison with the human TRBV5 exon, has 9 n.t. before the existence of a start codon. |
| TRBV5-2             | TRBV5-1              |                                                                                                                                                                                                    |
| TRBV6-2             | TRBV6-1              | <b>Partial gene and exon sequences at the 5' end.</b> The gene is missing 121 n.t. and the exon is missing 49 n.t..                                                                                |
| TRBV6-5             | TRBV6-9              | <b>Partial gene and exon sequences at the 3' end.</b> The gene is missing 48 n.t. and the exon is missing 9 n.t..                                                                                  |
| TRBV6-8             | TRBV6-5              | <b>Partial gene and exon sequences at the 3' end.</b> The gene is missing 85 n.t. end and the exon is missing 46 n.t..                                                                             |
| TRBV7-1             | TRBV7-1              | <b>Partial gene and exon sequences at the 5' end.</b> The gene is missing 199 n.t. and the exon is missing 57 n.t..                                                                                |
| TRBV7-2             | TRBV7-3              | <b>Partial gene and exon sequences at the 5' end.</b> The gene is missing 235 n.t. and the exon is missing 125 n.t..                                                                               |

**Supporting Information Data Files:**

**Rhesus\_macaque\_TRBV.fsa:** TRBV genes extracted from the rhesus macaque genome. The gene features reported include L-PART1, V-INTRON, V-EXON, V-HEPTAMER, V-SPACER, and V-NONAMER. The FASTA header fields include the species name, rhesus macaque chromosome 3 accession number (NC\_007860.1), start and end positions of gene feature in the rhesus macaque chromosome 3, strand (-1 indicates that the reported sequences are the reverse complement), gene name, and gene feature.

**Rhesus\_macaque\_TRBD.fsa:** TRBD genes extracted from the rhesus macaque genome. The gene features reported include 5'D-NONAMER, 5'D-SPACER, 5'D-HEPTAMER, D-REGION, 3'D-HEPTAMER, 3'D-SPACER, and 3'D-NONAMER. The FASTA header fields include the species name, rhesus macaque chromosome 3 accession number (NC\_007860.1), start and end positions of gene feature in the rhesus macaque chromosome 3, strand (-1 indicates that the reported sequences are the reverse complement), gene name, and gene feature.

**Rhesus\_macaque\_TRBJ.fsa:** TRBJ genes extracted from the rhesus macaque genome. The gene features reported include J-NONAMER, J-SPACER, and J-HEPTAMER. The FASTA header fields include the species name, rhesus macaque chromosome 3 accession number (NC\_007860.1), start and end positions of gene feature in the rhesus macaque chromosome 3, strand (-1 indicates that the reported sequences are the reverse complement), gene name, and gene feature.
